# Supplementary material for: Validation of IL-7R as an Immunological Biomarker for Human Pancreatic Ductal Adenocarcinoma
Source: MDPI journal article supplement (doi:10.3390/cancers14030853), 2022-02-08
Supplement: s1 [file s1]

**Supplementary Table S1. Primers used in the qRT-PCR.**

| Gene           | Primer    | Sequence                                |
|----------------|-----------|-----------------------------------------|
| <i>hIL-7RA</i> | Forward   | 5'-CTG GAG AAA GTG GCT ATG CTC-3'       |
|                | Reverse   | 5'-ACA TCT GGG TCC TCA AAA GC-3'        |
|                | Probe-FAM | 5'-CAG TTG GAA GTG AAT GGA TCG CAG C-3' |
| <i>hGAPDH</i>  | Forward   | 5'-CCA AGG TCA TCC ATG ACA ACT-3'       |
|                | Reverse   | 5'-ATC ACG CCA CAG TTT CCC-3'           |
|                | Probe-Joe | 5' ATC ACT GCC ACC CAG AAG ACT GTG-3'   |
